# Supplementary material
Source: ML conference proceedings conference paper supplement (https://openreview.net/forum?id=vR0GJh2ph2)
Supplement: supplementary_material [file attachment]

# Multi-Track Timeline Control for Text-Driven 3D Human Motion Generation

## Supplementary Material

We encourage the reader to view the supplementary video to observe qualitative results in motion (see Section A for interpretation). This appendix includes additional details about our STMC method (Section B), the creation of the MTT dataset (Section C), and our MDM-SMPL model (Section D). We also present a supplementary experiment in Section E.

### A. Supplementary Video with Qualitative Results

Besides this appendix, we provide a video where we visually explain the method and show qualitative results from STMC, along with a comparison to the baselines. By looking at the generated motions in the video, we can see more clearly the differences between the baselines and STMC. In particular, although SINC w/ Lerp has good metrics overall, some motions do not look natural to the human eye.

### B. Spatio-Temporal Motion Collage (STMC)

**Resolving unassigned timeframes.** This step corresponds to Step 2 of Fig. 3a of the main paper. As shown in Fig. A.1, we first cut the body part timelines so that there are no new texts appearing or disappearing within each cut (left). Then, we apply the SINC [1] heuristic (right) for each cut. The heuristic consists of (1) choosing a “base” text prompt, (2) assigning all the body parts to the base text, and (3) assigning (overriding) the body parts corresponding to the other texts. Note that the other texts are sorted based on the number of body parts involved in decreasing order.

**Runtime.** We compare the computational complexity of our STMC test-time denoising approach to the independent generation baseline (SINC w/o Lerp) where both methods use our MDM-SMPL backbone. This comparison highlights the overhead introduced in STMC, as the outputs need to be merged (both spatially and temporally) at each diffusion step. We measure the runtime on a single interval consisting of 3 prompts, which includes 3 transitions. On average, the generation time for SINC is approximately 1.14 sec compared to about 1.40 sec for STMC, totalling a 23% increase.

### C. Multi-Track Timeline (MTT) Dataset

**Full list of texts.** As mentioned in Sec. 4.1 of the main paper, to create the MTT dataset, we collect a set of 60 text prompts along with body parts labels for each one. Each of these atomic prompts is shown below, where the relevant body parts are annotated after the # symbol.

```
1 walk in a circle clockwise # legs
2 walk in a circle counterclockwise # legs
3 walk in a quarter circle to the left # legs
4 walk in a quarter circle to the right # legs
```

```
5 turn 180 degrees to the left on the left foot # legs
6 turn 180 degrees to the left on the right foot # legs
7 turn left # legs
8 turn right # legs
9 walk forwards # legs
10 walk backwards # legs
11 slowly walk forwards # legs
12 slowly walk backwards # legs
13 quickly walk forwards # legs
14 quickly walk backwards # legs
15 run # legs
16 jogs forwards # legs
17 jogs backwards # legs
18 perform a squat # legs # spine
19 sit down # legs # spine
20 low kick with the right foot # legs
21 low kick with the left foot # legs
22 high kick with the right foot # legs
23 high kick with the left foot # legs
24 applause # left arm # right arm
25 play the guitar # left arm # right arm
26 play the violin # left arm # right arm
27 raise both arms in the air # left arm # right arm
28 raise the right arm # right arm
29 raise the left arm # left arm
30 wave with the right hand # right arm
31 wave with the left hand # left arm
32 wave with both hands # left arm # right arm
33 talk on phone with left hand # left arm # head
34 talk on phone with right hand # right arm # head
35 point with his right hand # right arm
36 point with his left hand # left arm
37 drink with the left arm # left arm # head
38 drink with the right arm # right arm # head
39 eat something with the left arm # left arm # head
40 eat something with the right arm # right arm # head
41 look right # head
42 look left # head
43 dodge a hit to his head # head # spine
44 throw something with left hand # left arm
45 throw something with right hand # right arm
46 pick something with the left hand # left arm # legs # spine
47 pick something with the right hand # right arm # legs # spine
48 bow # spine # head
49 punch with the left hand # left arm
50 punch with the right hand # right arm
51 jump forward # legs # spine
52 jump backward # legs # spine
53 hop to the left # legs # spine
54 hop to the right # legs # spine
55 play golf # legs # left arm # right arm # head # spine
56 jumping jacks # legs # left arm # right arm # spine
57 touches back of head with right hand # right arm # head
58 touches back of head with left hand # left arm # head
59 wipe with the left hand # left arm
60 wipe with the right hand # right arm
```

Listing 1. **Full list of texts:** We use these text prompts as the base “atomic” actions for creating the MTT dataset.

**Sampling duration.** After choosing the text prompts, we randomly sample durations with a mean of 6.0 seconds and a standard deviation of 1.0 seconds.

**Samples from the MTT dataset.** As shown in Fig. A.2, our MTT dataset consists of diverse timelines.

### D. MDM-SMPL Additional Details

**Pose representation.** As presented in Sec. 3.4 of the main

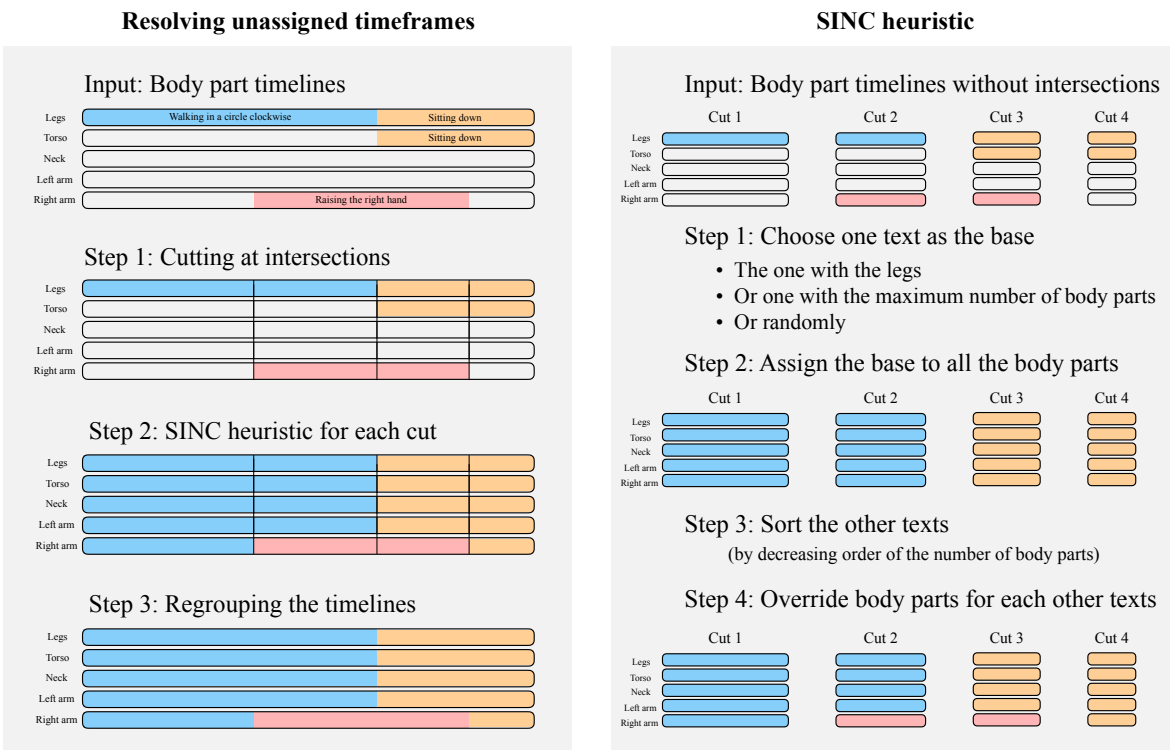

Figure A.1. **Additional details of STMC:** To create the final body parts timeline, we need to “fill the holes” by assigning a text to all locations of the body parts timeline (left). This is done by first splitting the timelines such that there is no intersection with other intervals, and then applying the SINC heuristic for each cut (right). Finally, we regroup the intervals by removing the cuts to obtain full body part timelines.

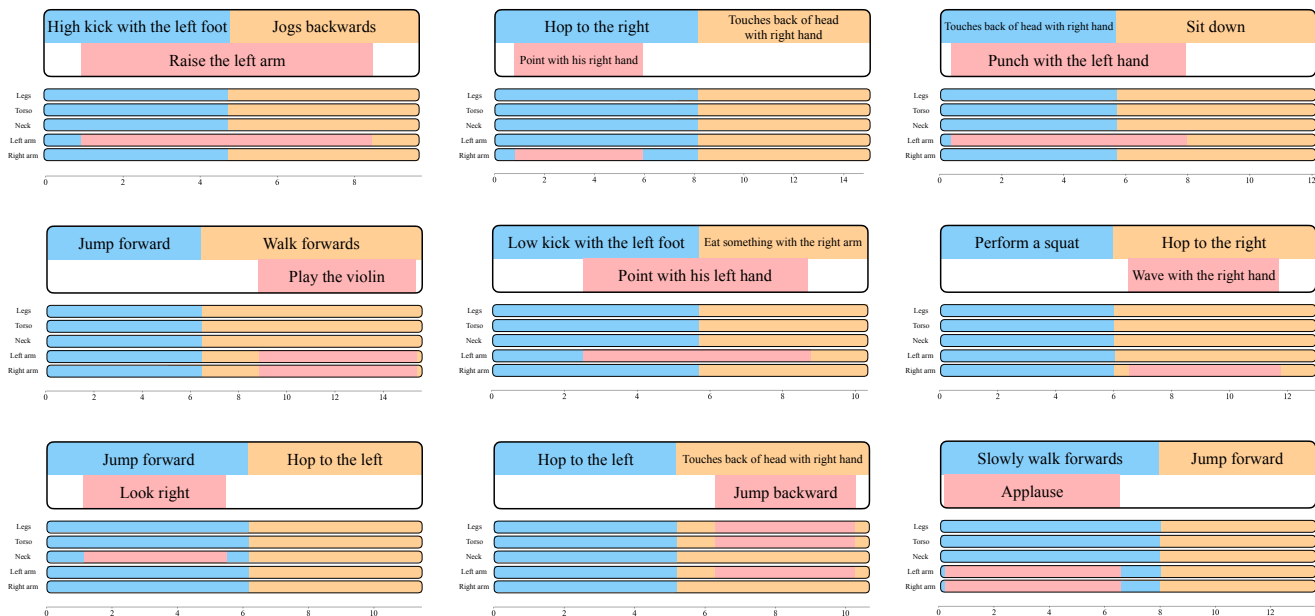

Figure A.2. **Example timelines from MTT dataset:** We display several generated timelines, along with the automatically generated body part timelines. Although each timeline contains only three prompts, the generated timelines are diverse and specify complicated motions.

| Total overlap (s) | Per-crop semantic correctness |       |                    |       | Realism |                          |
|-------------------|-------------------------------|-------|--------------------|-------|---------|--------------------------|
|                   | R@1 ↑                         | R@3 ↑ | TMR-Score ↑<br>M2T | M2M   | FID ↓   | Transition<br>distance ↓ |
| 0.25              | 30.1                          | 51.7  | 0.675              | 0.666 | 0.459   | 1.0                      |
| 0.4               | 29.9                          | 51.1  | 0.675              | 0.666 | 0.459   | 1.0                      |
| 0.5               | 30.5                          | 50.9  | 0.675              | 0.665 | 0.459   | 0.9                      |
| 0.6               | 30.3                          | 50.8  | 0.674              | 0.665 | 0.459   | 0.9                      |
| 0.75              | 28.9                          | 50.4  | 0.672              | 0.664 | 0.460   | 0.9                      |
| 1.0               | 28.5                          | 49.1  | 0.670              | 0.662 | 0.459   | 0.9                      |
| 1.25              | 28.9                          | 48.6  | 0.668              | 0.660 | 0.458   | 0.9                      |

Table A.1. **Influence of the overlap size:** We report the performance of STMC (with MDM-SMPL) while varying the total overlap size ( $2 * l$ ). We observe that a smaller overlap size leads to a higher transition distance but each crop matches the description better (higher per-crop semantic correctness metrics). We observe the opposite for a larger overlap size.

paper, we propose a motion representation for diffusion that includes SMPL pose parameters. We represent a pose  $x \in \mathbb{R}^d$  by  $x = [r_z, \dot{r}_x, \dot{r}_y, \dot{\alpha}, \theta, \mathbf{j}]$  where  $r_z$  is the Z (up) coordinate of the pelvis,  $\dot{r}_x$  and  $\dot{r}_y$  are the linear velocities of the pelvis,  $\dot{\alpha}$  is the angular velocity of the Z angle of the body,  $\theta$  are the SMPL [7] pose parameters (encoded with the 6D representation [9]), and  $\mathbf{j}$  are the joints positions (computed with the SMPL layer). Inspired by Holden et al. [6] and Guo et al. [5], which use a rotation invariant representation, we represent the joints  $\mathbf{j}$  in a coordinate system local to the body. To make  $\theta$  local to the body, we remove the Z rotation from the SMPL global orientation. This representation enables us to directly extract the SMPL pose parameters, eliminating the need for optimization-based methods typically used to generate a mesh, as in previous work [2, 10].

**Architecture and training.** We use a similar architecture as MDM [8], but make the following changes (in addition to using the SMPL body):

- We use a cosine schedule as introduced by [3] with 100 steps instead of a linear schedule with 1000 steps.
- After padding to the maximum duration in a batch, we mask the padded area in the Transformer encoder so that the padded area is not used for the computation.

Other minor changes include using two separate tokens for the diffusion step  $t$  and the text embedding (instead of one), using two register tokens (introduced in [4]), and pre-computing CLIP embeddings for faster training. We train the model for 10000 epochs with a batch size of 128.

## E. Experiment: Varying the Overlap Size

As outlined in Sec. 4.3 of the main paper, we also experiment with varying the size of the overlap for temporal stitching (corresponding to  $2 * l$  in the paper) and display the results in Tab. A.1. We find that a smaller overlap size results in a higher transition distance. This means that the transitions may be more noticeable. However, it also leads to a more accurate match of each crop with its corresponding description, as indicated by higher per-crop semantic correctness metrics.

With a larger overlap size, the transitions become smoother (i.e., lower transition distance), but this comes at the cost of reduced per-crop semantic correctness metrics.

## References

- [1] Nikos Athanasiou, Mathis Petrovich, Michael J. Black, and Gül Varol. SINC: Spatial composition of 3D human motions for simultaneous action generation. In *International Conference on Computer Vision (ICCV)*, 2023. 1
- [2] Federica Bogo, Angjoo Kanazawa, Christoph Lassner, Peter Gehler, Javier Romero, and Michael J. Black. Keep it SMPL: Automatic estimation of 3D human pose and shape from a single image. In *European Conference on Computer Vision (ECCV)*, 2016. 3
- [3] Ting Chen. On the importance of noise scheduling for diffusion models. *arXiv:2301.10972*, 2023. 3
- [4] Timothée Darcet, Maxime Oquab, Julien Mairal, and Piotr Bojanowski. Vision transformers need registers. *arXiv:2309.16588*, 2023. 3
- [5] Chuan Guo, Shihao Zou, Xinxin Zuo, Sen Wang, Wei Ji, Xingyu Li, and Li Cheng. Generating diverse and natural 3D human motions from text. In *Computer Vision and Pattern Recognition (CVPR)*, 2022. 3
- [6] Daniel Holden, Jun Saito, and Taku Komura. A deep learning framework for character motion synthesis and editing. *ACM Transactions on Graphics (TOG)*, 2016. 3
- [7] Matthew Loper, Naureen Mahmood, Javier Romero, Gerard Pons-Moll, and Michael J. Black. SMPL: A skinned multi-person linear model. *ACM Transactions on Graphics (TOG)*, 2015. 3
- [8] Guy Tevet, Sigal Raab, Brian Gordon, Yoni Shafir, Daniel Cohen-or, and Amit Haim Bermano. Human motion diffusion model. In *International Conference on Learning Representations (ICLR)*, 2023. 3
- [9] Yi Zhou, Connelly Barnes, Jingwan Lu, Jimei Yang, and Hao Li. On the continuity of rotation representations in neural networks. In *Computer Vision and Pattern Recognition (CVPR)*, 2019. 3
- [10] Xinxin Zuo, Sen Wang, Jiangbin Zheng, Weiwei Yu, Minglun Gong, Ruigang Yang, and Li Cheng. Sparsefusion: Dynamic human avatar modeling from sparse rgbd images. *IEEE Transactions on Multimedia*, 2021. 3
